# Supplementary material
Source: publisher figshare collection journal article supplement (https://acs.figshare.com/ndownloader/files/11857142)
Supplement: Supplementary file 1 [file 11857142]

# Cyanylated cysteine reports site-specific changes at protein-protein interfaces without perturbation

Shannon R. Dalton<sup>1</sup>, Alice R. Vienneau<sup>1</sup>, Shana R. Burstein<sup>1</sup>, Rosalind J. Xu<sup>1</sup>, Sara Linse<sup>2</sup>, and Casey H. Londergan<sup>1,\*</sup>

<sup>1</sup>Department of Chemistry, Haverford College, 370 Lancaster Ave, Haverford, PA 19041-1392 USA and <sup>2</sup>Department of Chemistry and Biochemistry, Lund University, Kemicentrum, Box 118, 221 00 LUND, Sweden

## Supporting Information

### 1. Isothermal Titration Calorimetry

The following data were acquired for seven M13 peptides (see table 1 in the main manuscript for sequences, and “WT” is the unmodified M13 sequence) titrated with recombinant wild-type calmodulin. The data points shown below are peak areas determined following baseline correction of the raw titration data. The fits are all to either a single “independent” sigmoidal model for binding, or in some cases, to a “two-sites” double-sigmoidal model for binding for titrations where a second process was suggested by the data.

The signal:noise ratio for S23C\* was not high enough to distinguish clearly between a one- and a two-sites fit. A two-sites fit is clearly implicated for F8C\*, and this is discussed in the main manuscript; this led to our also performing the “backwards” titration experiment with an independent sample of F8C\* which led to very similar fitting parameters.

Figure S1 follows: integrated areas for ITC titrations of calmodulin into peptide solutions, with fits to independent (single-sigmoid) binding models. Full parameters calculated from these fits are then presented in Table S1.

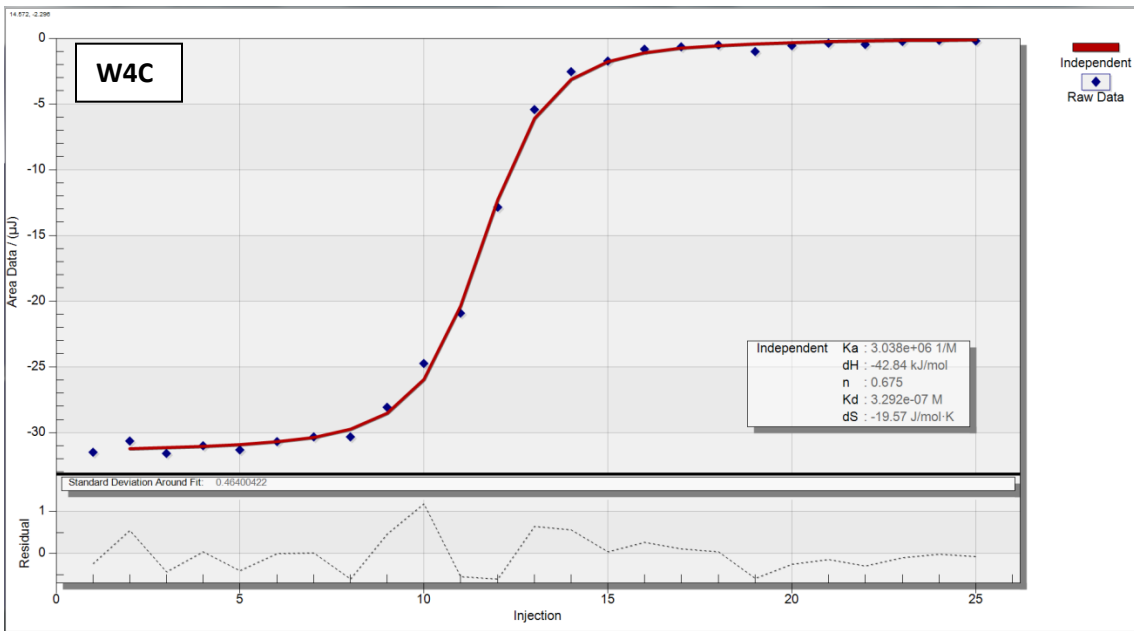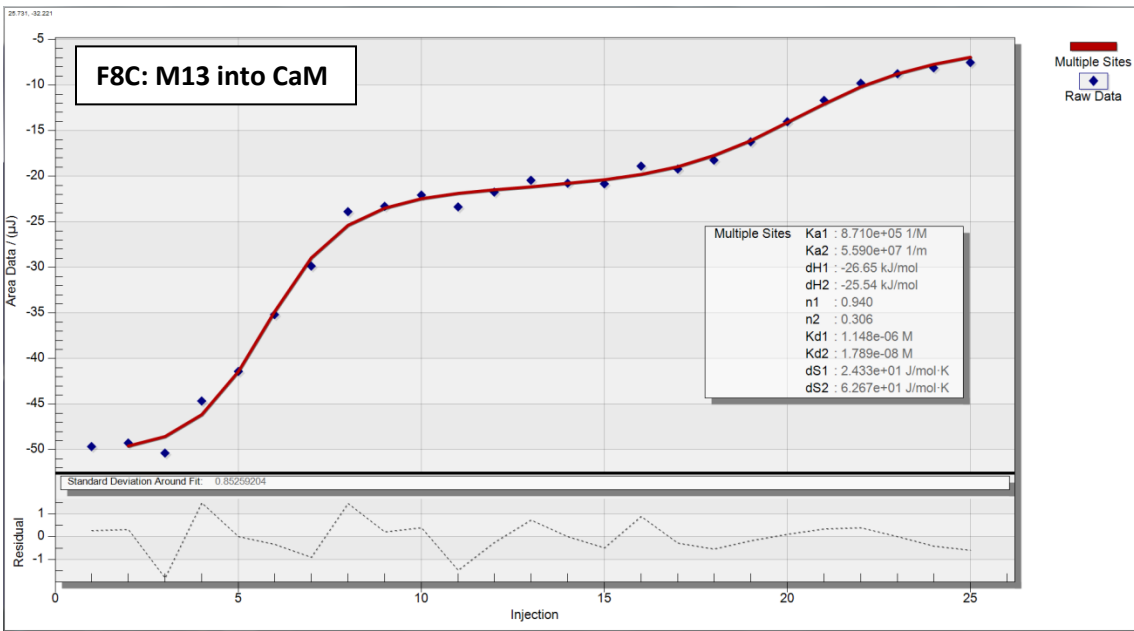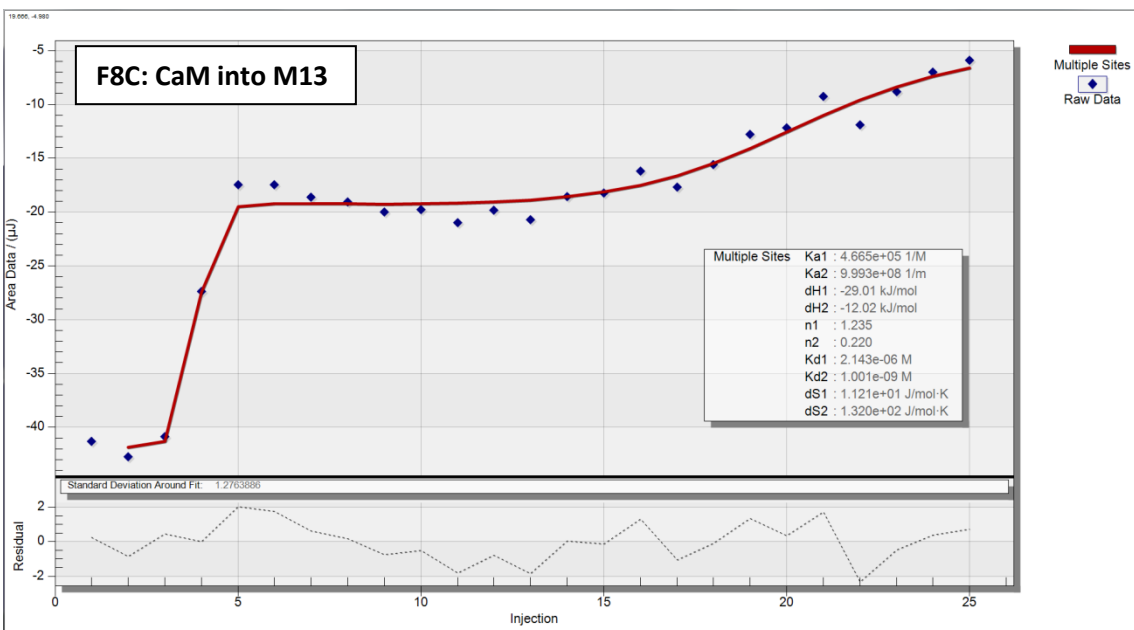

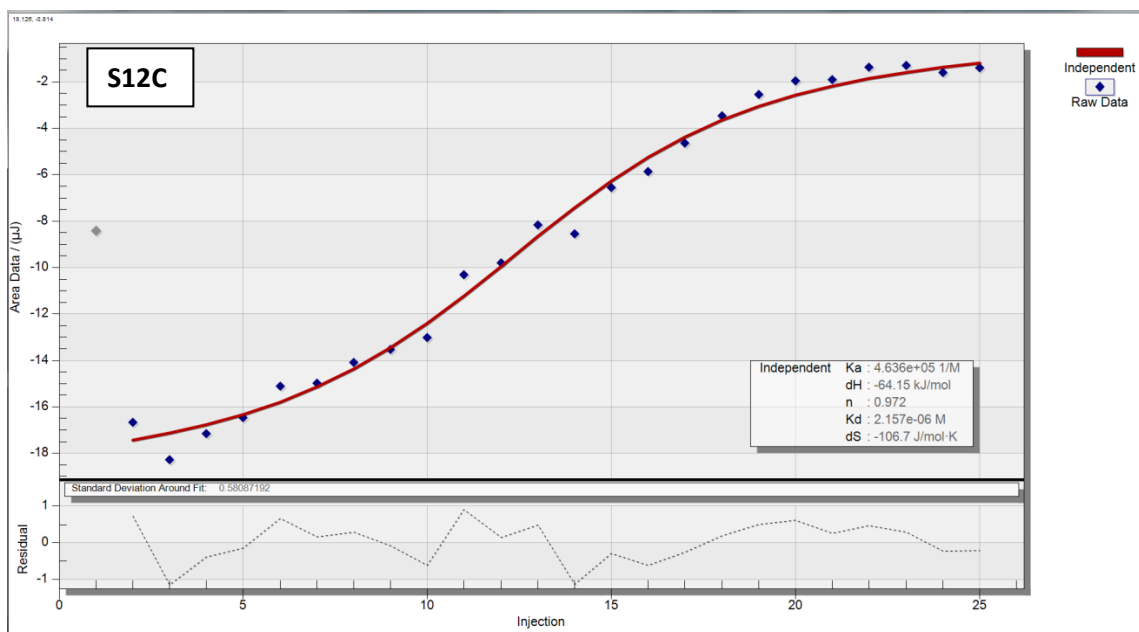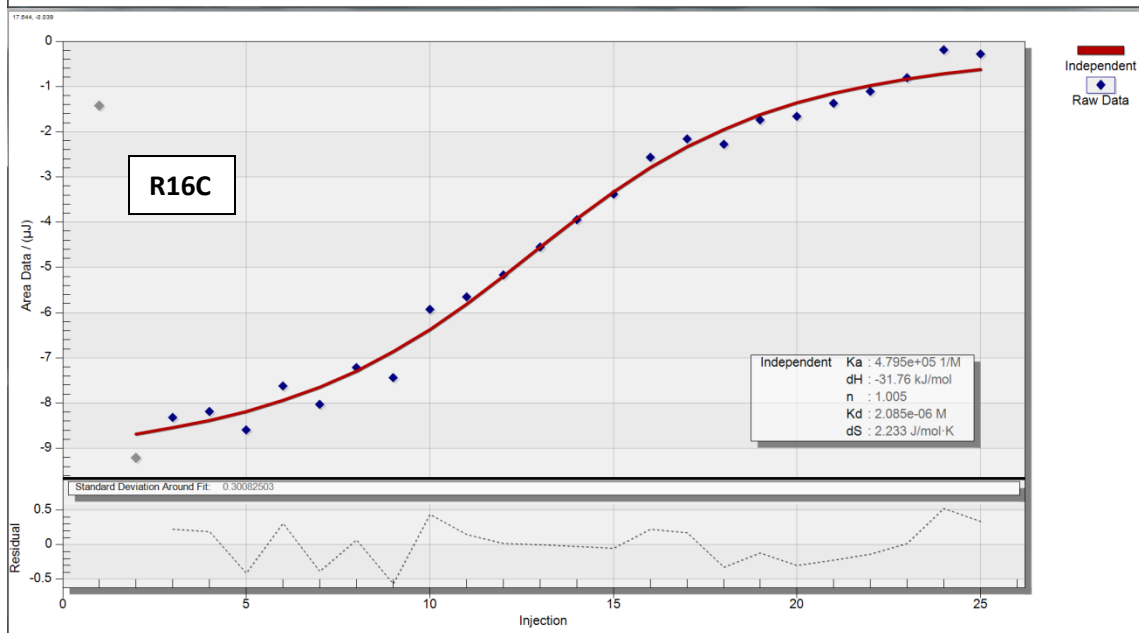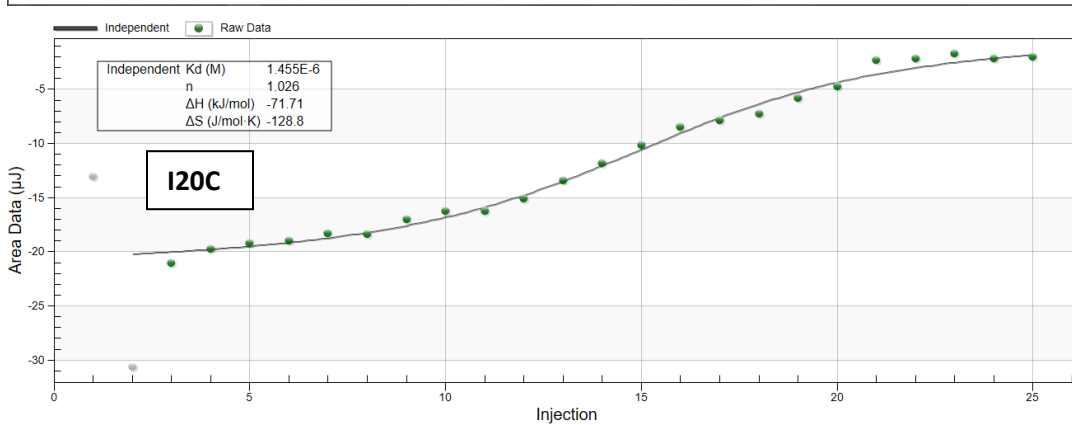

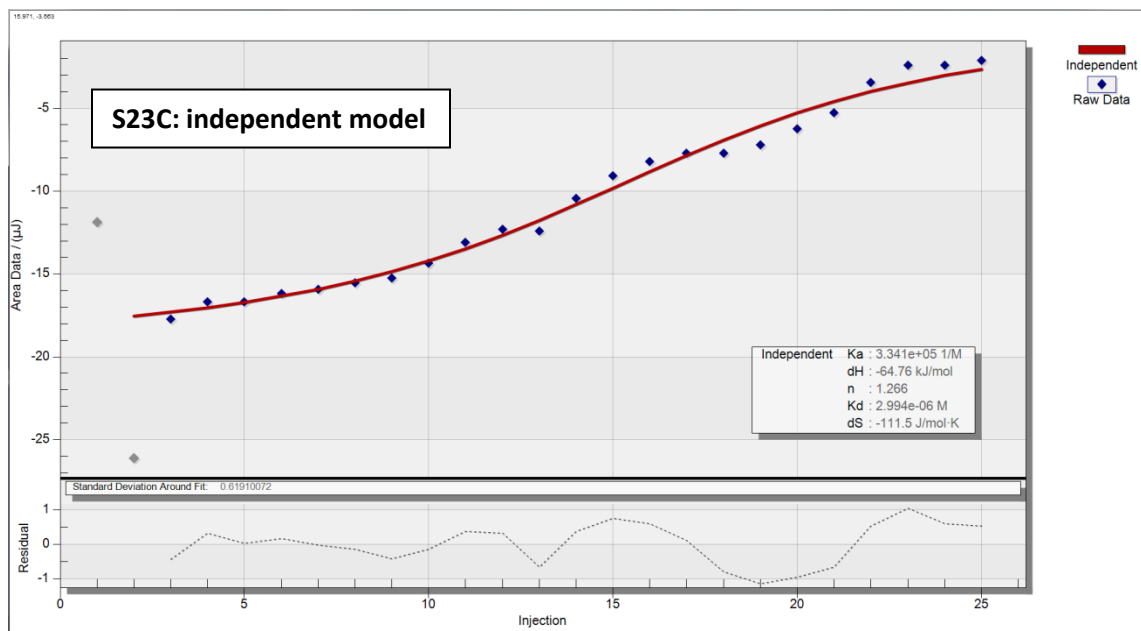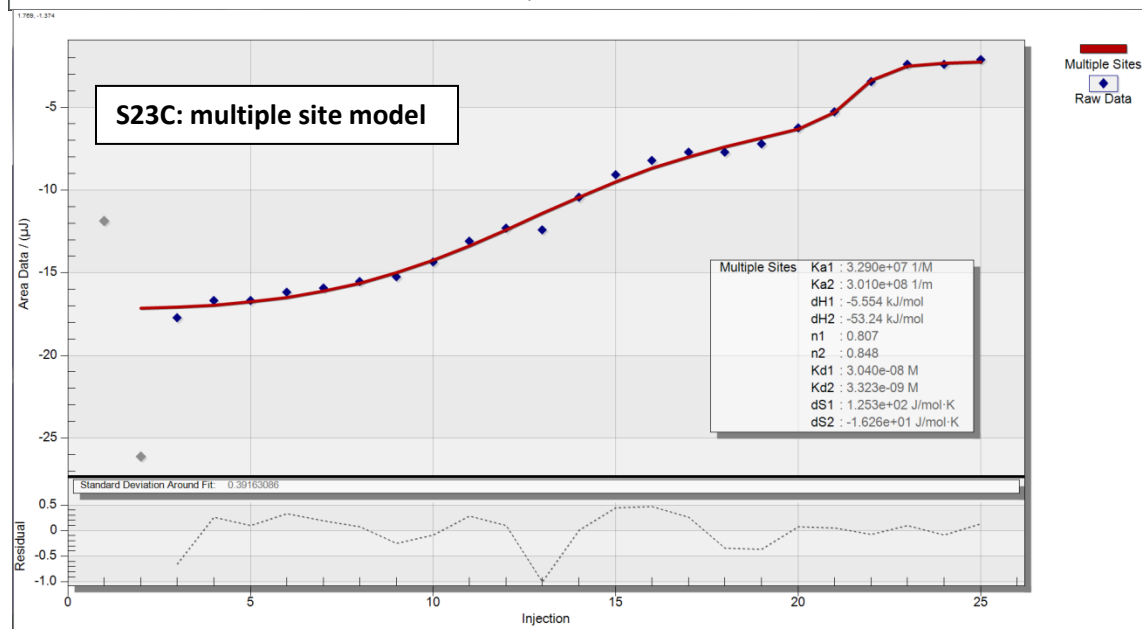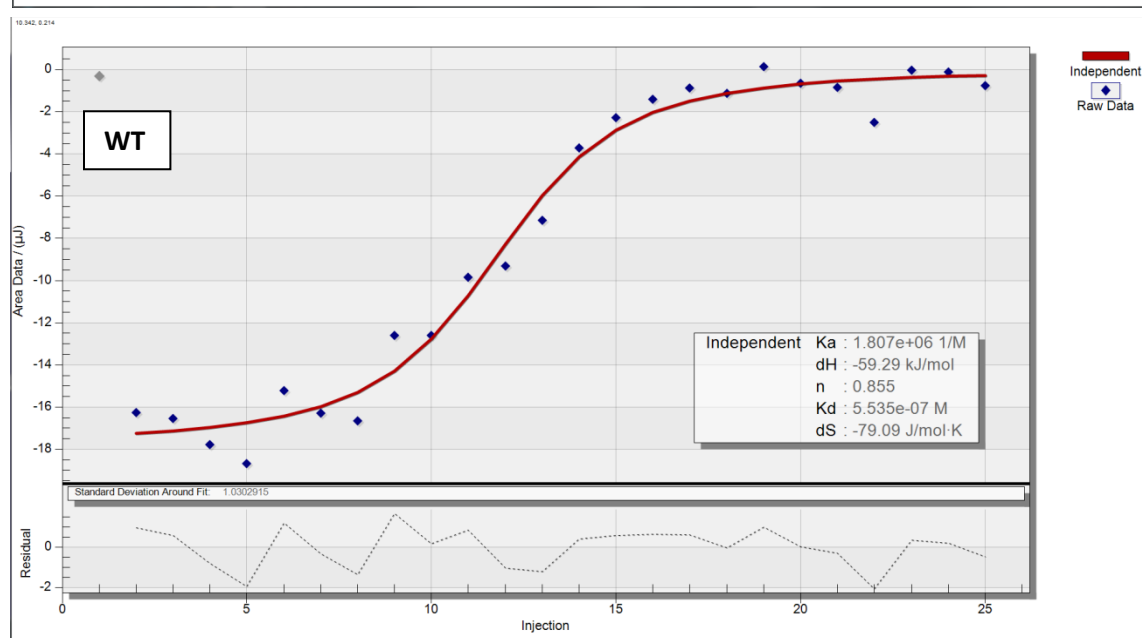

**Table S1: binding parameters calculated from fits to the ITC titration curves.**

| <i>variant</i> | <i>n</i> | <i>K<sub>D</sub></i> | <i>ΔG</i><br>(kJ/mol) | <i>ΔH</i><br>(kJ/mol) | <i>ΔS</i> (J/mol<br>K) | <i>ΔΔG</i><br>(kJ/mol) | <i>ΔΔH</i><br>(kJ/mol) | <i>ΔΔS</i><br>(J/mol K) |
|----------------|----------|----------------------|-----------------------|-----------------------|------------------------|------------------------|------------------------|-------------------------|
| <b>W4C*</b>    | 0.9      | 3E-07                | -37                   | -43                   | -20.                   | -1                     | 16                     | 59                      |
| <b>F8C*</b>    | 0.9      | 1E-06                | -34                   | -27                   | 24                     | 2                      | 33                     | 100                     |
| <b>S12C*</b>   | 0.9      | 2E-06                | -32                   | -65                   | -110                   | 3                      | -5                     | -28                     |
| <b>R16C*</b>   | 1.0      | 2E-06                | -32                   | -32                   | 2.2                    | 3                      | 28                     | 81                      |
| <b>I20C*</b>   | 1.1      | 1E-06                | -33                   | -72                   | -130                   | 2                      | -13                    | -51                     |
| <b>S23C*</b>   | 1.0      | 3E-06                | -32                   | -65                   | -110                   | 4                      | -5                     | -32                     |
| <b>wt</b>      | 0.9      | 5E-07                | -36                   | -60.                  | -79                    |                        |                        |                         |

## 2. Infrared spectroscopy

Table S2: the calculated lineshape parameters for each of the six C\*-containing variants of M13, in buffer solution and with calmodulin. The standard deviation and FWHM were calculated as described in the experimental methods section.

| Peptide | Buffer mode / $\text{cm}^{-1}$ | CaM mode / $\text{cm}^{-1}$ | Buffer mean / $\text{cm}^{-1}$ | CaM mean / $\text{cm}^{-1}$ | Buffer FWHM / $\text{cm}^{-1}$ | CaM FWHM / $\text{cm}^{-1}$ |
|---------|--------------------------------|-----------------------------|--------------------------------|-----------------------------|--------------------------------|-----------------------------|
| W4C*    | 2164.6                         | 2156.0                      | 2163.2                         | 2157.2                      | 11.1                           | 14.3                        |
| F8C*    | 2163.5                         | 2157.7                      | 2163.0                         | 2155.6                      | 12.2                           | 13.3                        |
| S12C*   | 2163.5                         | 2156.7                      | 2162.8                         | 2157.7                      | 15.3                           | 14.5                        |
| R16C*   | 2163.1                         | 2161.2                      | 2161.1                         | 2159.8                      | 14.8                           | 19.2                        |
| I20C*   | 2163.5                         | 2160.6                      | 2161.6                         | 2160.8                      | 17.4                           | 15.9                        |
| S23C*   | 2164.4                         | 2163.5                      | 2162.6                         | 2161.6                      | 14.6                           | 15.3                        |

### 3. Supplementary data from molecular dynamics

Angular distributions for orientation of probe side chains in MD simulations:

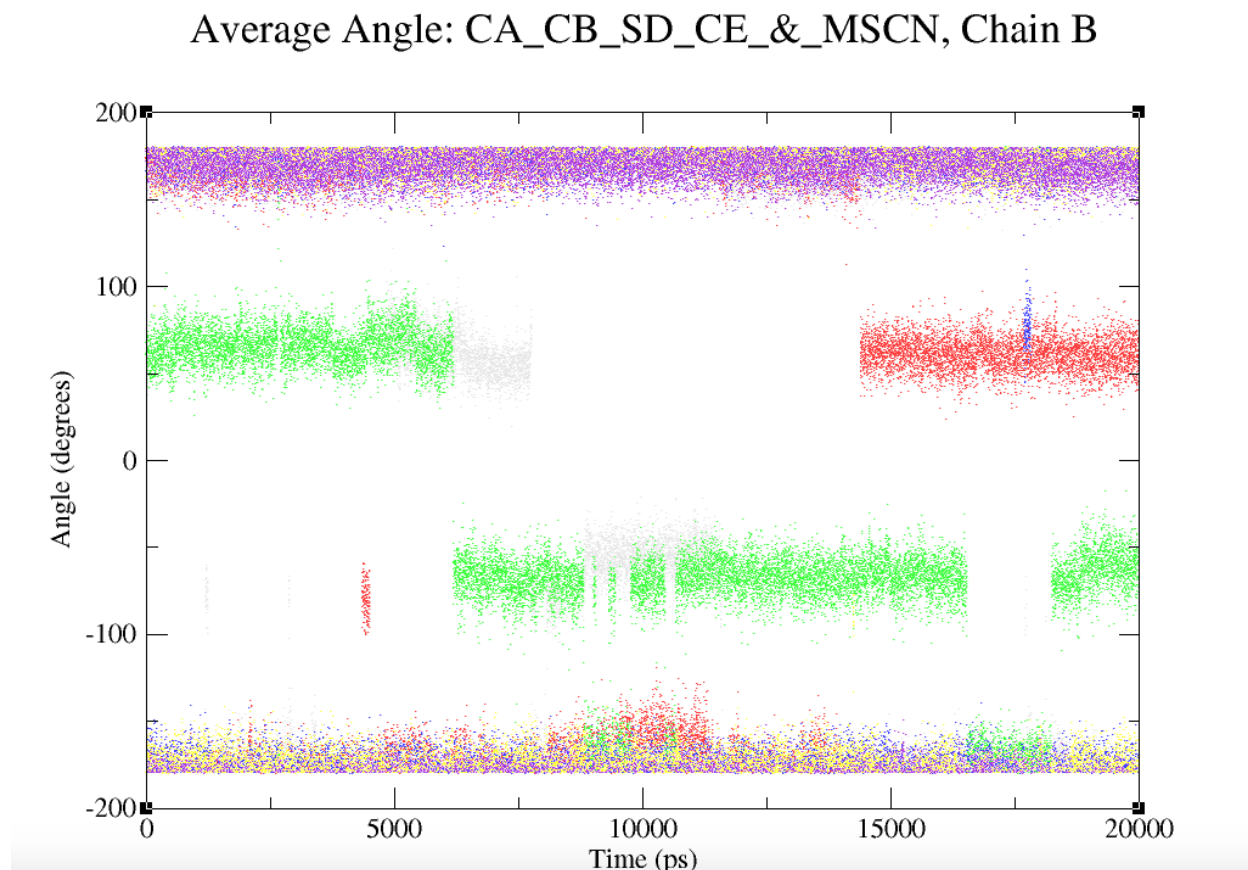

Figure S2. Dihedral angles (measured through  $C\alpha$ - $C\beta$ -S-C for the cyanylated cysteine residue) throughout a 20 ns MD trajectory for labels at the six selected sites along the M13 peptide. (colors: yellow: W4C\*; violet: F8C\*; grey: S12C\*; red: R16C\*; green: I20C\*; blue: S23C\*) While the majority prefer a trans (180 degrees) configuration, a few sites in the middle region of M13 (S12C\*, R16C\*, I20C\*) tend towards substantial sampling of gauche (60 or -60 degrees) configurations due to local steric restrictions. The dihedral angles, however, do not seem to correlate with either mean frequencies or linewidths. Fast (sub-ns) fluctuations of the SCN group orientation were in general *not* observed.

Distributions of solvent accessible surface area for each probe site:

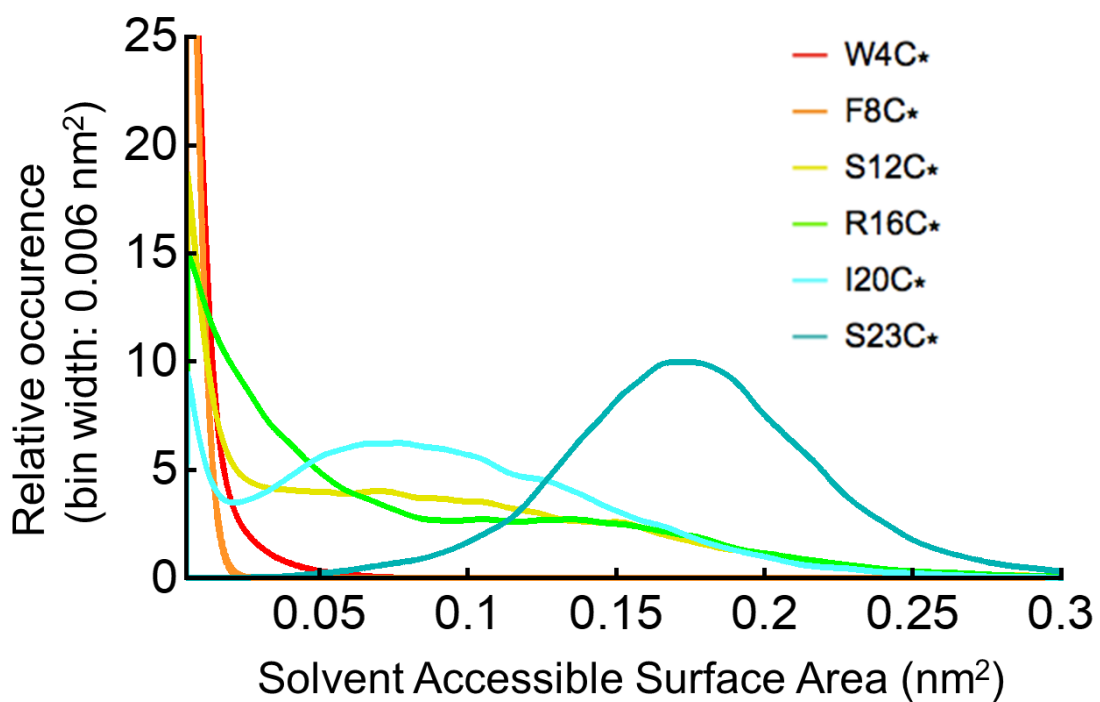

Figure S3. Histogram distributions for solvent accessible surface area for the SCN nitrogen atom calculated from the 20 ns MD trajectories, represented as lines.
